# Supplementary material
Source: PubMed Central journal article supplement (PMC4551588)
Supplement: EC.00022-15_zek999094442so1.pdf [file EC.00022-15_zek999094442so1.pdf]

## Supplementary methods

### Detailed plasmid construction

Plasmids generated in previous work are listed in table S1.

To obtain *pcts2Δ\_hyg*, we PCR amplified a 1.6 kb upstream part of *cts2* with the primers RL495/RL496 and a downstream part with RL497/RL498 integrating *Bsa*I-restriction sites for Golden Gate cloning. The flanks together with the hygromycin resistance cassette from pStorI\_1hs were cloned into the plasmid backbone of pDest. *pcts3Δ\_hyg* was obtained by integrating a PCR generated 1.5 kB fragment (upstream of the *cts3* gene; with primers RL479/480) and a 900 bp downstream fragment (with primers RL481/482) into pRS426 via yeast recombinational cloning. *pcts2Δ\_nat* and *pcts3Δ\_g418* were obtained by replacing the hygromycin resistance cassette by the nourseothricin resistance cassette from *prrm4Δ\_nat* or the G418 resistance cassette from pMFg1, respectively. To obtain *pcts4Δ\_hyg* upstream and downstream flanking regions of the *cts4* ORF were PCR generated using the primer pairs RL1267/RL1268 and RL1269/RL1270, respectively, and cloned into the plasmid backbone of pDest together with the hygromycin resistance cassette of pStorI\_1hs. *pcts4Δ\_cbx* was obtained by replacing the hygromycin resistance cassette from *pcts4Δ\_hyg* by the carboxin resistance cassette from pStorI\_1c. To obtain *pcts2:egfp* the upstream flank, containing the *cts2* ORF, and the downstream flank were generated by PCR using the primer pairs RL1292/RL1293 and RL1294/RL1295, respectively, and cloned into pDest together with the hygromycin resistance cassette of pStorII\_5-1h. Similarly, *pcts3:egfp* was obtained by cloning PCR generated flanks (primer pairs RL1300/RL1301 and RL1302/RL1303) with the same vectors.

### Mating assay

To test mating competence of *U. maydis* chitinase mutants, cultures were grown to an OD<sub>600</sub> of 0.8 in CM, washed once in H<sub>2</sub>O and resuspended to an OD<sub>600</sub> of 1 in H<sub>2</sub>O. 500 μl of the suspension of each mating partner was premixed in a reaction tube. 60 μl of the mating reaction was spotted into an empty petri dish, sealed with parafilm and incubated O/N at 22 °C. Mating was observed microscopically.

### RNA isolation, generation of cDNA, and semi-quantitative PCR

RNA was extracted from yeast cultures similar to (1) using Trizol (Invitrogen) according to the manufacturer's instructions. DNA contaminations were removed by treatment with Turbo-DNase (Ambion). After DNase treatment total RNA was purified by acidic phenol/chloroform purification. 1 μg of total RNA was used for reverse transcription with Superscript III First-Strand Synthesis SuperMix (Invitrogen) and Oligo(dT)<sub>20</sub> primers according to manufacturer's instructions. For semi-quantitative RT-PCR 1 μl cDNA (1 μg/μl) was used in a PCR-reaction undergoing 25 cycles (logarithmic phase of amplification). Three independent experiments were conducted with biological replicates each leading to reproducible results. Specific primers for *cts1*, *cts2*, *cts3*, and *cts4* were used to determine relative gene expression. Actin specific primers were used as an endogenous control for each template. cDNA from yeast cells and filaments were used to determine gene expression patterns in each growth phase. Minus reverse transcriptase controls were added to exclude contamination by genomic DNA. Genomic DNA was used as template to determine primer efficiency and H<sub>2</sub>O was used as negative control.

## Supplementary tables

**Table S1: Plasmids used in this study**

| <b>Plasmid</b>      | <b>Reference</b> |
|---------------------|------------------|
| <i>prrm4Δ</i> _nat  | (2)              |
| pMF1g               | (3)              |
| pRS426              | (4)              |
| pDest               | (5)              |
| pStorI_1hs          | (5)              |
| pStorII_5-1h        | (5)              |
| <i>pcts2Δ</i> _hyg  | this study       |
| <i>pcts3Δ</i> _hyg  | this study       |
| pStorI_1c           | (5)              |
| <i>pcts2Δ</i> _nat  | this study       |
| <i>pcts3Δ</i> _g418 | this study       |
| <i>pcts4Δ</i> _hyg  | this study       |
| <i>pcts2:egfp</i>   | this study       |
| <i>pcts3:egfp</i>   | this study       |
| <i>pcts4Δ</i> _cbx  | this study       |

**Table S2: DNA oligonucleotides used in this study**

| <b>Designation</b>      | <b>Sequence</b>                                           |
|-------------------------|-----------------------------------------------------------|
| MF502                   | ACGACGTTGTA AACGACG GCCAG                                 |
| MF503                   | TTCACACAGGAAACAGCTATGACC                                  |
| MF963                   | TGGAAAGCGGGCAGTGAG                                        |
| MF964                   | GCGCAACTGTTGGGAAGG                                        |
| RL479 cts3 U2           | GTAACGCCAGGGTTTTCCAGTCACGACGAATATTACATCAGCTATTCAGTGTTACGC |
| RL480 cts3 U3           | CCACTCGAGTGC GGCCGCAATTGTCACGCCATGGTAACTCCTAATGTGTGCG     |
| RL481 cts3 D1           | CTGCTGCGCCGCGAAGCTGTGCGGCCG CATTAAATAGGTCTGCGCACCTGTTTGG  |
| RL482 cts3 D2           | GCGGATAACAATTTTACACAGGAAACAGCAATATTTCCACACCTTAGTGACGG     |
| RL483 cts3 P1           | GAAGTTCTCCCACTCGG                                         |
| RL484 cts3 P2           | GTTGACGCTCTTGGTCGG                                        |
| RL485 cts3 U1           | TTCCATGCCACGCACACC                                        |
| RL486 cts3 D3           | CAAGCACAGACGGTTCGG                                        |
| RL495 cts2 U2           | GGTCTCGCCTGCAAATATTTGTAATTCGTGATGG                        |
| RL496 cts2 U3           | GGTCTCCAGGCCCGCGGTGACCGAGAGGGG                            |
| RL497 cts2 D1           | GGTCTCCGGCCATACGCTATCACACATCC                             |
| RL498 cts2 D2           | GGTCTCGCTGCAAATATTTGGTGACTGTCAATACC                       |
| RL499 cts2 P1           | GTCACGCACTCAGTGTGG                                        |
| RL500 cts2 P2           | GGCAGTTGGTTTCGCAGC                                        |
| RL501 cts2 U1           | TGTGTACACACTGGCGCG                                        |
| RL502 cts2 D3           | TAGCACCGATTGCGAGCG                                        |
| RL955_cts2_probe-for    | GCTGACACGAGAATCGTG                                        |
| RL956_cts2_probe-rev    | GCCAAGCGTACAGACCTAC                                       |
| RL957_cts2_Probe-DF-for | CCATCTCAACCGCCTTTC                                        |
| RL958_cts2_Probe-DF_rev | GGCAA ACTCACACGGAAG                                       |
| RL959_cts3-Probe-UF-for | GATGCGAACCTCAGGCATC                                       |
| RL960_cts3-Probe-UF-rev | CGTATGAGCACATGCTACG                                       |
| RL961_cts3-Probe-DF-for | GTTGGTCTTGGCTCTCAC                                        |
| RL962_cts3-Probe-DF-rev | CATCCACGCCTTGGACAC                                        |
| RL1266_U1 cts4          | TTTGGTGCCTCGACTCGC                                        |
| RL1267_U2 cts4          | GGTCTCGCCTGCAATATTCGCGACTCGACCTTTTTAC                     |
| RL1268_U3 cts4          | GGTCTCCAGGCCTGTTTGTGAAGCAGGTATG                           |
| RL1269_D1 cts4          | GGTCTCCGGCCCGACACAGCACTCGCCGTG                            |
| RL1270_D2 cts4          | GGTCTCGCTGCAATATTCATGCGTCCGCTTCAAG                        |
| RL1271_D3 cts4          | GCTACTGACCTTGTGCC                                         |
| RL1272_P1 cts4          | TCGTTGGCGCTTTCTCTG                                        |
| RL1273_P2 cts4          | AGGGCAAGGAGTTGTGTC                                        |
| RL1291_U1-cts2          | ACAACGCGCAGAAGTTCG                                        |
| RL1292_U2-cts2          | GGTCTCGCCTGCAATATTGATGGTTTTCCGTGTTTGG                     |
| RL1293_U3-cts2          | GGTCTCCTGGCCATGCTCAATCCGGCAGCGTC                          |
| RL1294_D1-cts2          | GGTCTCCGGCCACAGCATACGCTATCACAC                            |
| RL1295_D2-cts2          | GGTCTCGCTGCAATATTCTGTGTTCTCAATGCCCGGC                     |
| RL1296_D3-cts2          | CGCGATCTGCTTGAACATCC                                      |
| RL1297_P1-cts2          | ACAAGTTGGTCGTCGGTAAG                                      |
| RL1298_P2-cts2          | TTGAAAGCGGTTGAGATGG                                       |

**Table S2 (continued): DNA oligonucleotides used in this study**

|                   |                                    |
|-------------------|------------------------------------|
| RL1299_U1-cts3    | GCCTACAGCCGAGTTTGATC               |
| RL1300_U2-cts3    | GGTCTCGCCTGCAATATTCGTCAAGGCAGCCAAG |
| RL1301_U3-cts3    | GGTCTCCTGGCCAGGGAAGAGATAGCACCTGTC  |
| RL1302_D2-cts3    | GGTCTCCGGCCGTCTGCGCACCTGTTTGGTGTTG |
| RL1303_D2-cts3    | GGTCTCGCTGCAATATTC AACAGGATCCTACG  |
| RL1304_D3-cts3    | CACAAACTCATCCACTCCCG               |
| RL1305_P1-cts3    | TCAACGCTCGTCTCACAG                 |
| RL1306_P2-cts3    | TAGCTAGCACGCATACAG                 |
| RL1314_cts3-seq-f | GGATTGGACAGCCTCGAC                 |

## References

1. **Heimel K, Scherer M, Vranes M, Wahl R, Pothiratana C, Schuler D, Vincon V, Finkernagel F, Flor-Parra I, Kamper J.** 2010. The Transcription Factor Rbf1 Is the Master Regulator for b-Mating Type Controlled Pathogenic Development in *Ustilago maydis*. *Plos Pathogens* **6**.
2. **Baumann S, König J, Koepke J, Feldbrügge M.** 2014. Endosomal transport of septin mRNA and protein indicates local translation on endosomes and is required for correct septin filamentation. *Embo Reports* **15**:94-102.
3. **Baumann S, Pohlmann T, Jungbluth M, Brachmann A, Feldbrugge M.** 2012. Kinesin-3 and dynein mediate microtubule-dependent co-transport of mRNPs and endosomes. *Journal of Cell Science* **125**:2740-2752.
4. **Sikorski RS, Hieter P.** 1989. A System of Shuttle Vectors and Yeast Host Strains Designed for Efficient Manipulation of DNA in *Saccharomyces-Cerevisiae*. *Genetics* **122**:19-27.
5. **Terfrüchte M, Joehnk B, Fajardo-Somera R, Braus GH, Riquelme M, Schipper K, Feldbrügge M.** 2014. Establishing a versatile Golden Gate cloning system for genetic engineering in fungi. *Fungal Genetics and Biology* **62**:1-10.

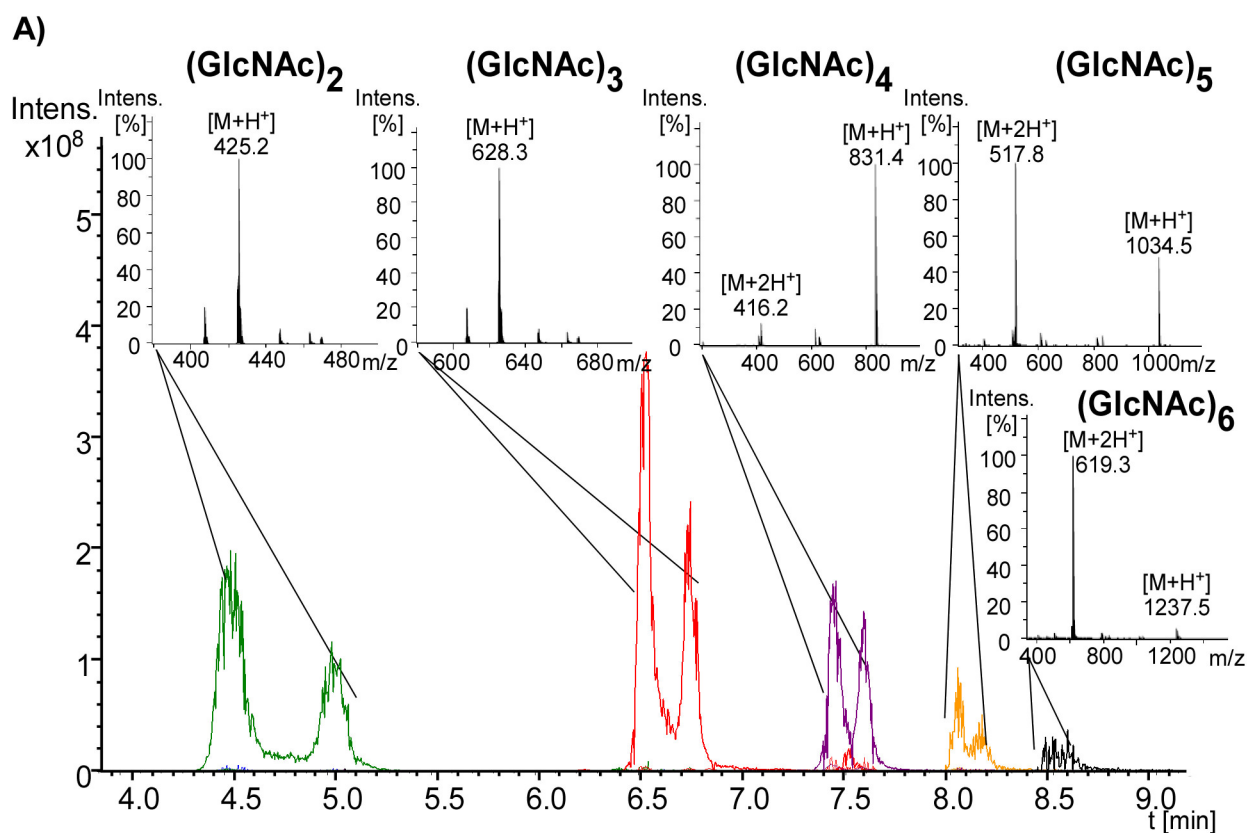

**B)**

| Product               | Conjugated ion |                |                  |                  |                 |
|-----------------------|----------------|----------------|------------------|------------------|-----------------|
|                       |                | H <sup>+</sup> | 2 H <sup>+</sup> | 3 H <sup>+</sup> | Na <sup>+</sup> |
| GlcNAc                | 221.1          | 222.1          | 111.5            | 74.7             | 244.1           |
| (GlcNAc) <sub>2</sub> | 424.2          | 425.2          | 213.1            | 142.4            | 447.2           |
| (GlcNAc) <sub>3</sub> | 627.2          | 628.2          | 314.6            | 210.1            | 650.2           |
| (GlcNAc) <sub>4</sub> | 830.3          | 831.3          | 416.2            | 277.8            | 853.3           |
| (GlcNAc) <sub>5</sub> | 1 033.4        | 1 034.4        | 517.7            | 345.5            | 1 056.4         |
| (GlcNAc) <sub>6</sub> | 1 236.5        | 1 237.5        | 619.2            | 413.2            | 1 259.5         |

**Fig. S1: Chito-oligosaccharide standards for UPLC-MS analysis of hydrolysis products.** (A) Extracted Ion Chromatogram (EIC) and ESI-MS analysis of specific chito-oligosaccharides). (GlcNAc)<sub>2</sub> (m/z 425.2; green), (GlcNAc)<sub>3</sub> (m/z 628.3; red), (GlcNAc)<sub>4</sub> (m/z 831.4; purple), (GlcNAc)<sub>5</sub> (m/z 517.7; yellow) and (GlcNAc)<sub>6</sub> (m/z 619.3; black). (B) Theoretical masses of chito-oligosaccharides with different charges and adducts used for the EIC spectra.

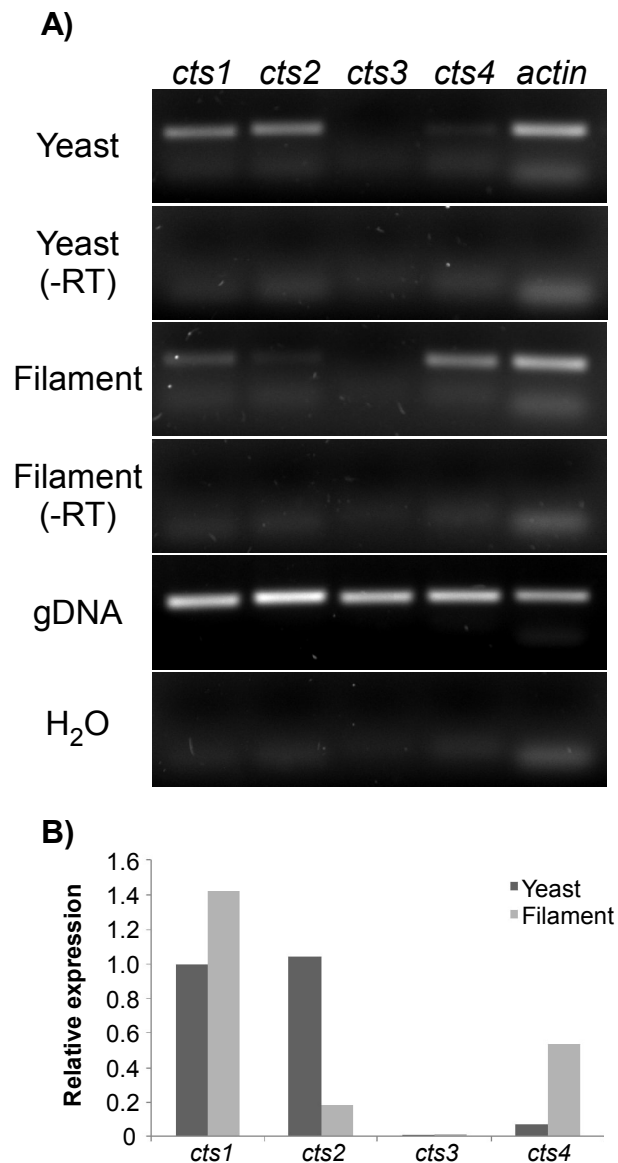

**Fig. S2: Gene expression analysis of chitinolytic enzymes. (A)** Semi-quantitative RT-PCR of chitinase genes in yeast cells and filaments. Both, *cts1* and *cts2* are expressed equally strong during yeast-like growth of AB33. During filamentous growth *cts2* gets drastically down regulated. *cts3* is not expressed in either yeast cells or filaments. *cts4* shows basal expression in yeast cells and gets up regulated in filaments. *actin* was included as an endogenous control. Minus reverse transcriptase (-RT) controls of each sample were used to exclude contamination by genomic DNA. **(B)** Similar expression patterns for *cts1*, *cts2*, *cts3*, and *cts4* were extracted from published microarray data (Heimel et al., 2010).

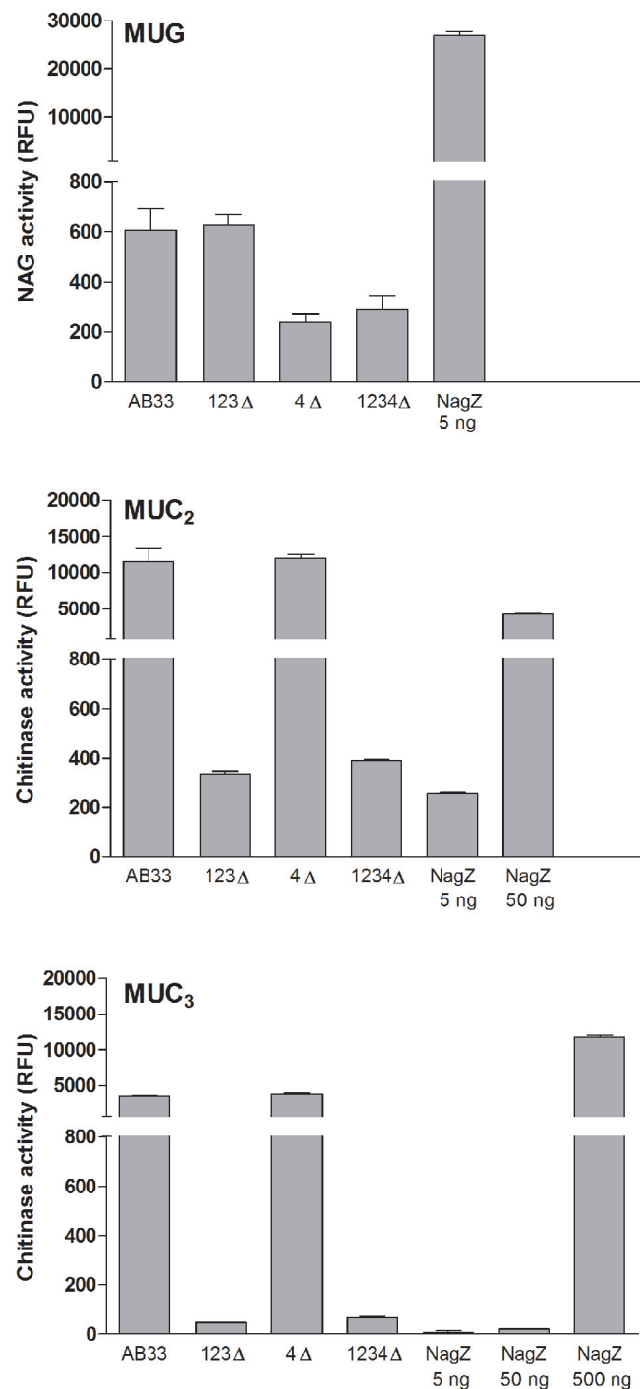

**Fig. S3: NAG activity towards the chitinase substrates MUC<sub>2</sub> and MUC<sub>3</sub>.** To exclude contribution of Cts4 NAG-activity towards fluorescent chitinase substrates, intact cells of AB33, AB33cts1Δcts2Δcts3Δ, AB33cts4Δ, and AB33cts1Δcts2Δcts3Δcts4Δ were compared to BsNagZ (N-acetyl-glucosaminidase nagZ from *Bacillus subtilis*; Hamer et al., 2014). 5 ng NagZ efficiently degrade MUG, but 10x higher concentrations are required for degradation of MUC<sub>2</sub> and 100x higher concentrations for MUC<sub>3</sub>. Activity of Cts4 in AB33cts1Δcts2Δcts3Δ towards MUG is lower than the activity of 5 ng NagZ and is at the same basal level below the detection limit in assays with the MUC<sub>2</sub> and MUC<sub>3</sub>. Therefore, low levels of Cts4 potentially influencing chitinase activity measurements in this assay is neglectable.

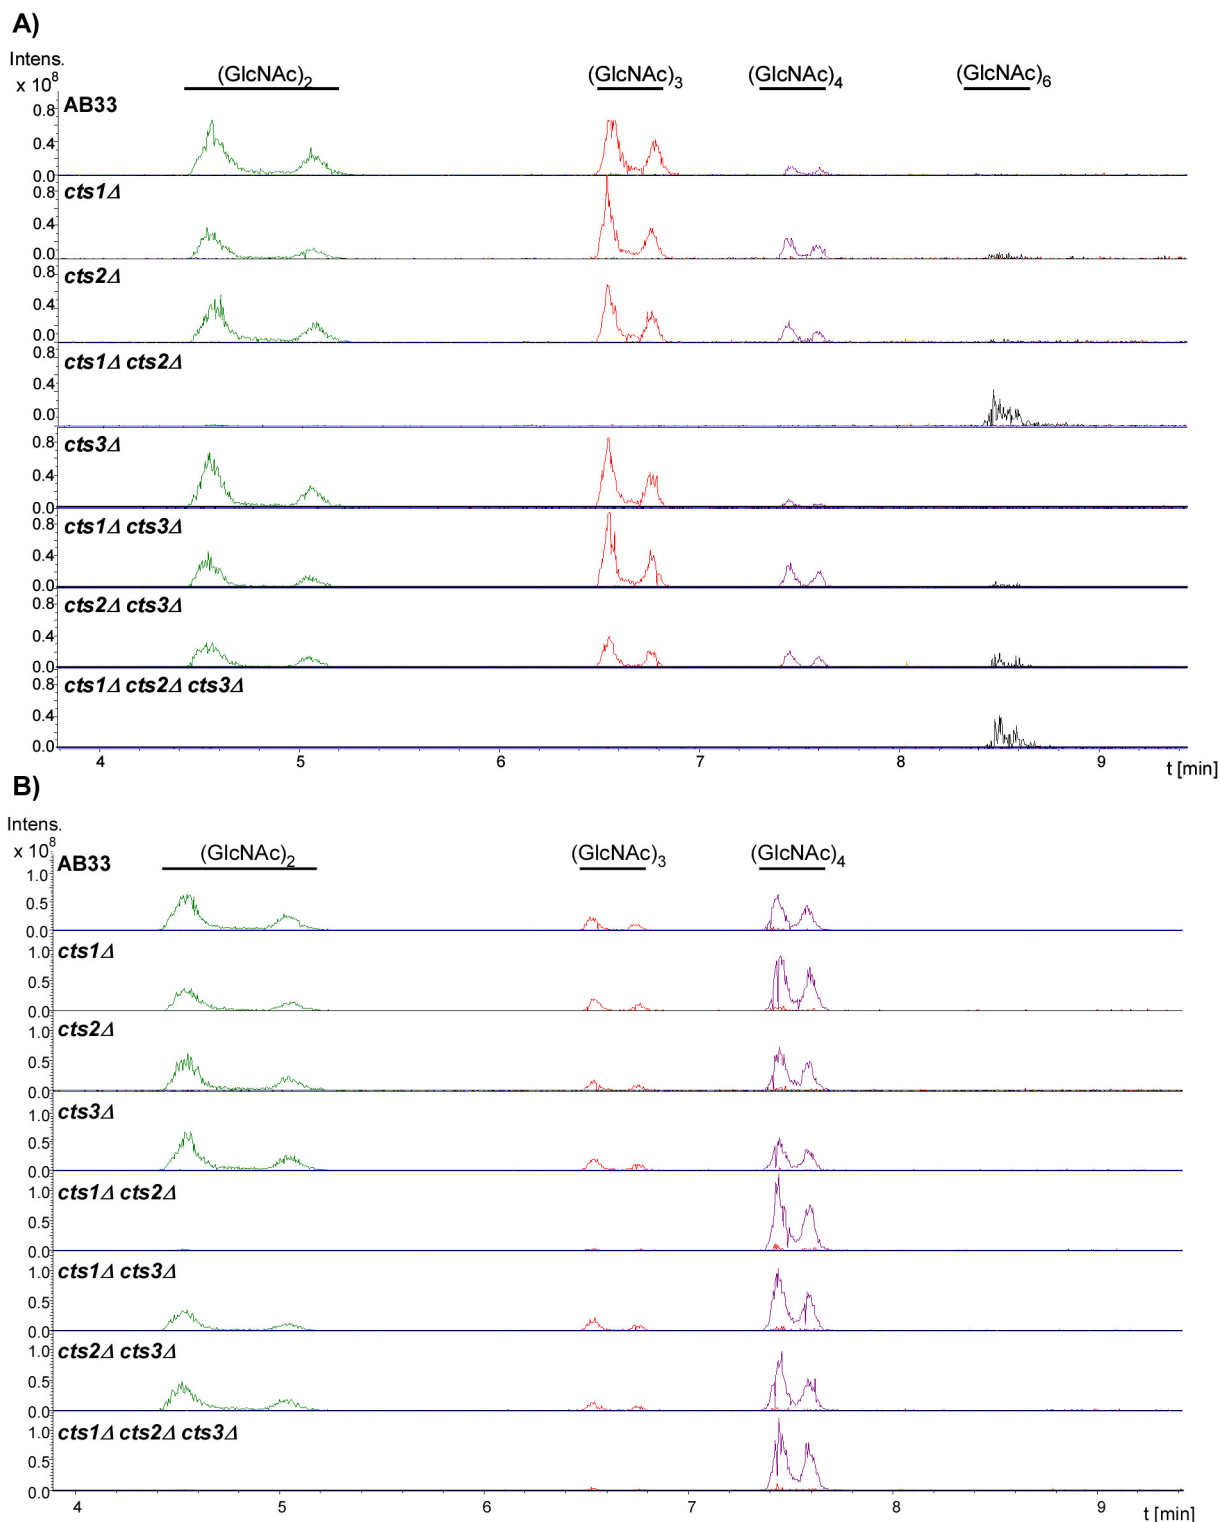

**Fig. S4: Cts1 and Cts2 process chito-oligosaccharides.** Extracted Ion Chromatograms (EIC) of hydrolysis products of chito-oligomers incubated with 5  $\mu$ g *U. maydis* total protein extracts. **(A)** The chito-hexamer (GlcNAc)<sub>6</sub> is partially degraded in strains containing either Cts1 or Cts2, but not in double mutants lacking both chitinases. **(B)** Similarly, the chito-tetramer (GlcNAc)<sub>4</sub> is degraded in strains containing Cts1 and Cts2, but not in the double mutants. (GlcNAc)<sub>2</sub> (m/z 425.2; green), (GlcNAc)<sub>3</sub> (m/z 628.3; red), (GlcNAc)<sub>4</sub> (m/z 831.4; purple) and (GlcNAc)<sub>6</sub> (m/z 619.3; black).



**A) Yeast cells**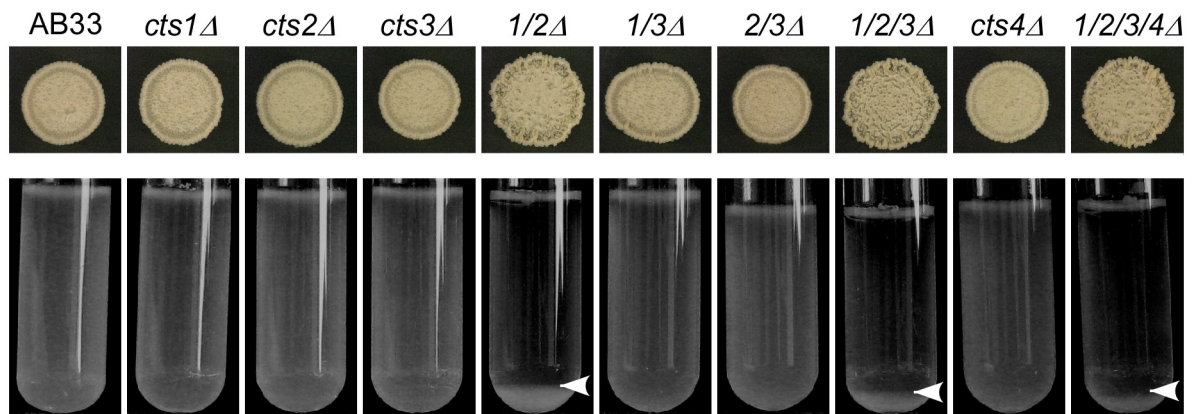**B) Filaments**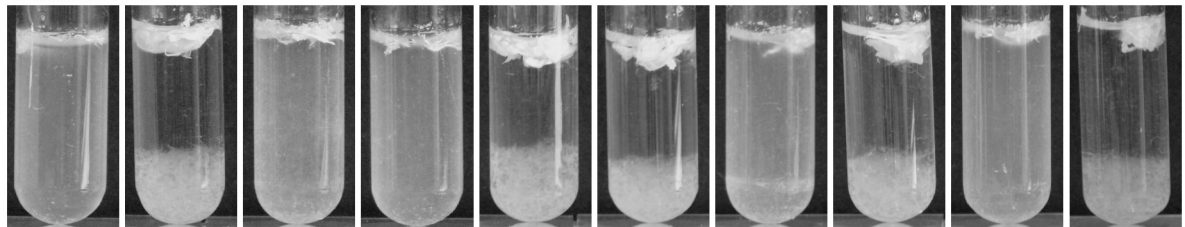

**Fig. S5: Macroscopic phenotypes of the chitinase deficient mutants. (A)** Colony morphology and sedimentation assay of *U. maydis* chitinase deletion strains. *cts1/2Δ*-deletion strains and derived mutants show an altered colony morphology and form aggregates which sediment fast in liquid medium as indicated by the arrowhead. **(B)** Sedimentation assay of AB33 and chitinase deficient strains. Strains were grown to an  $OD_{600}$  of 0.5 and transferred to NM-G for 16h for filament induction. After 5 min without shaking all strains which lack the chitinase Cts1 showed faster sedimentation in liquid medium.

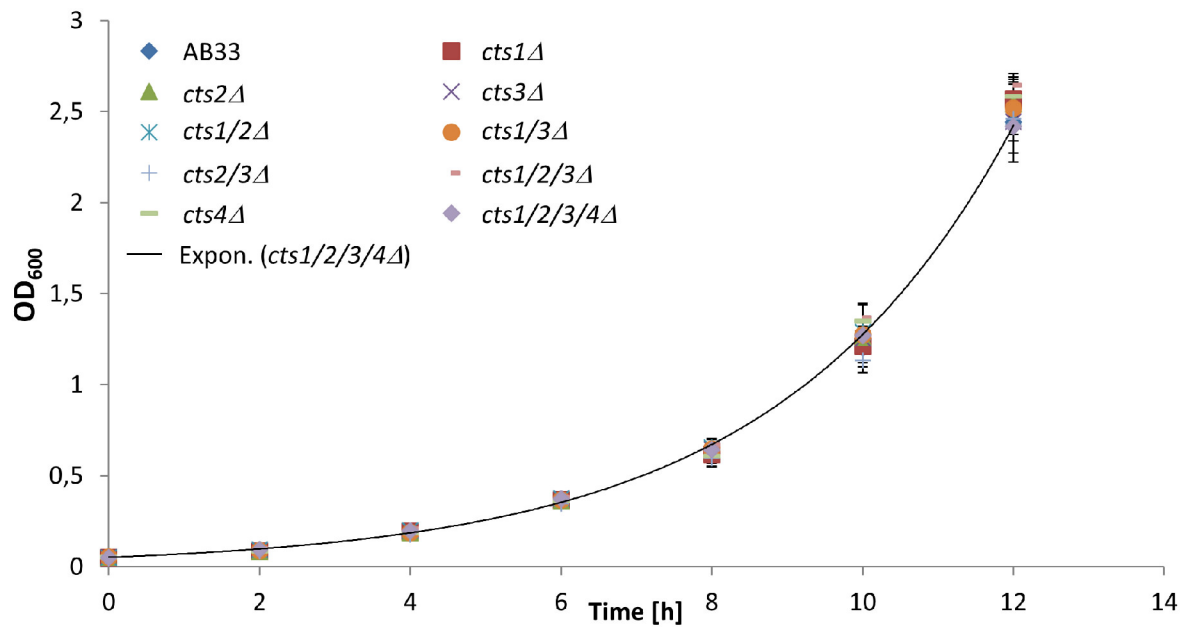

**Fig. S6: Chitinases do not affect growth rate of *U. maydis*.** Exponentially growing cultures at an OD<sub>600</sub> of 0.8 were diluted to an OD<sub>600</sub> of 0.05 and growth was measured as OD<sub>600</sub>. All mutants up to the complete chitinase deficient quadruple mutant have doubling times comparable to AB33. The line shows an exemplary exponential fit for AB33*cts1*Δ*cts2*Δ*cts3*Δ*cts4*Δ illustrating exponential growth. Error bars represent standard deviation from 3 independent experiments.

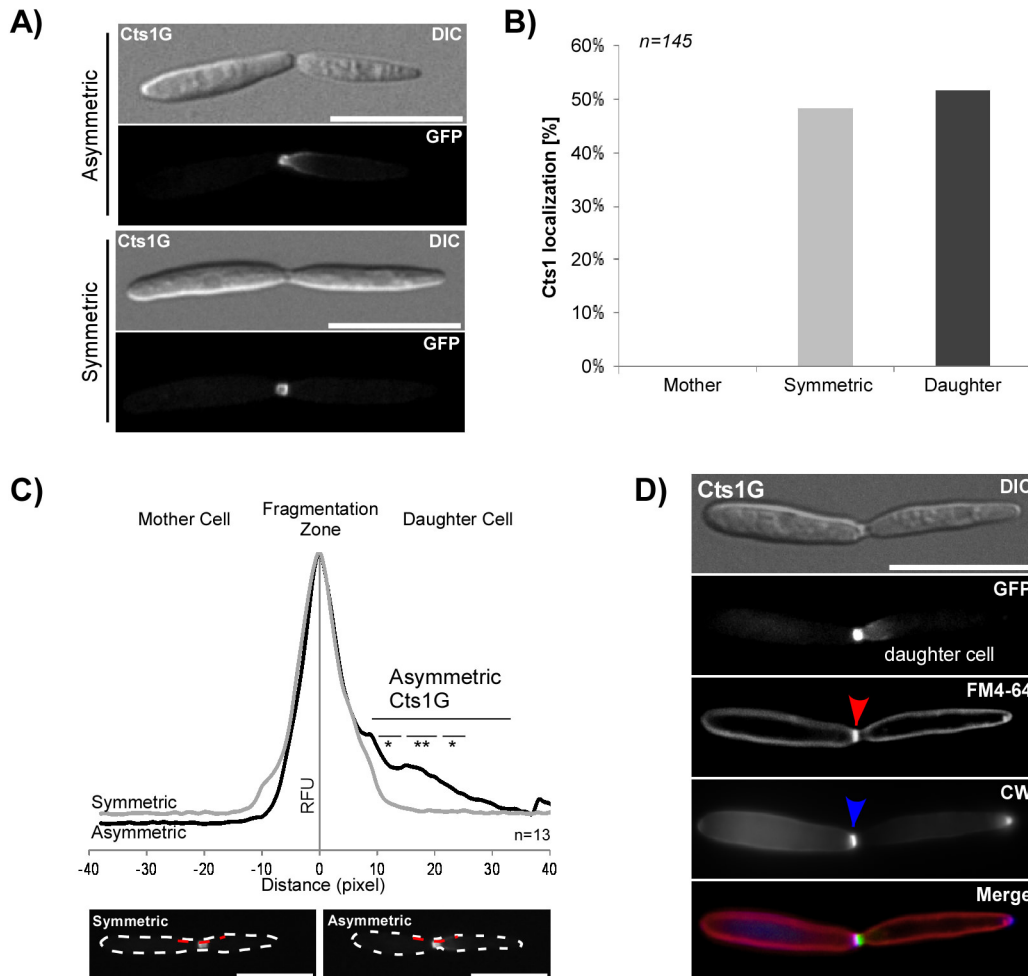

**Fig. S7: Cts1G localizes to the fragmentation zone from the daughter cell. (A)** Fluorescent microscopic observation of Cts1G localization. Cts1G localizes either asymmetrically forming a gradient with a maximum at the fragmentation zone (top) or symmetrically to the center of the fragmentation (bottom). **(B)** Quantification of Cts1G localization. A total of 145 cells were observed and localization was categorized as “Mother” (Cts1G localization at the mother side), “Symmetric” (Cts1G localization to the center of the fragmentation zone), or “Daughter” (Cts1G localization to the daughter side). 70 cells (48.3 %) showed symmetric Cts1G, 75 cells (51.7 %) showed Cts1G localization to the daughter side, and no cells showed Cts1G localization to the mother side. **(C)** Linescan analysis of asymmetric Cts1G distribution. A portion of Cts1G localizes asymmetrically at the daughter side, whereas the amount of cytoplasmic Cts1G is similar in all cells. A total of 26 cells (13 symmetric, 13 asymmetric) were analyzed by linescan as shown exemplarily (bottom panel, red line). Cts1G is significantly enriched at the daughter side. \*,  $p < 0,05$ , \*\*,  $p < 0,005$  (students t-test). **(D)** Fluorescent co-localization analysis of asymmetric Cts1G localization with the lipophilic dye FM4-64 and the cell wall marker CW. Cts1G localizes to the fragmentation zone after primary septum formation by the mother cell. Cell membrane: red arrowhead; primary septum: blue arrowhead.

**A) Yeast cells**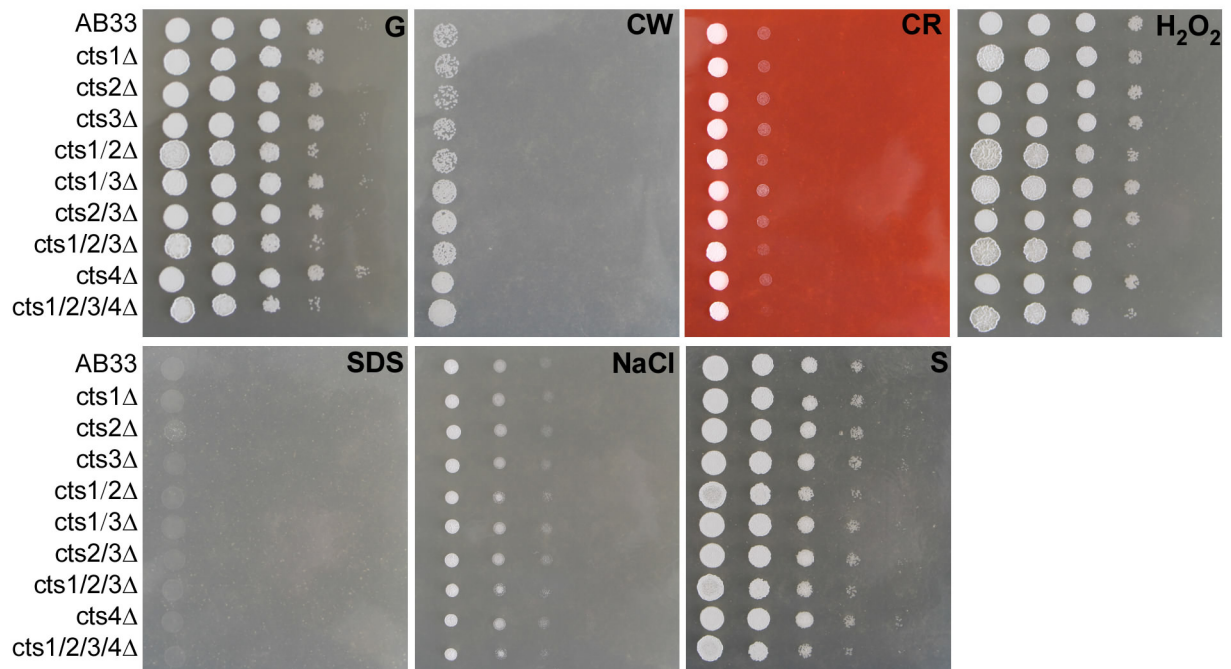**B) Filaments**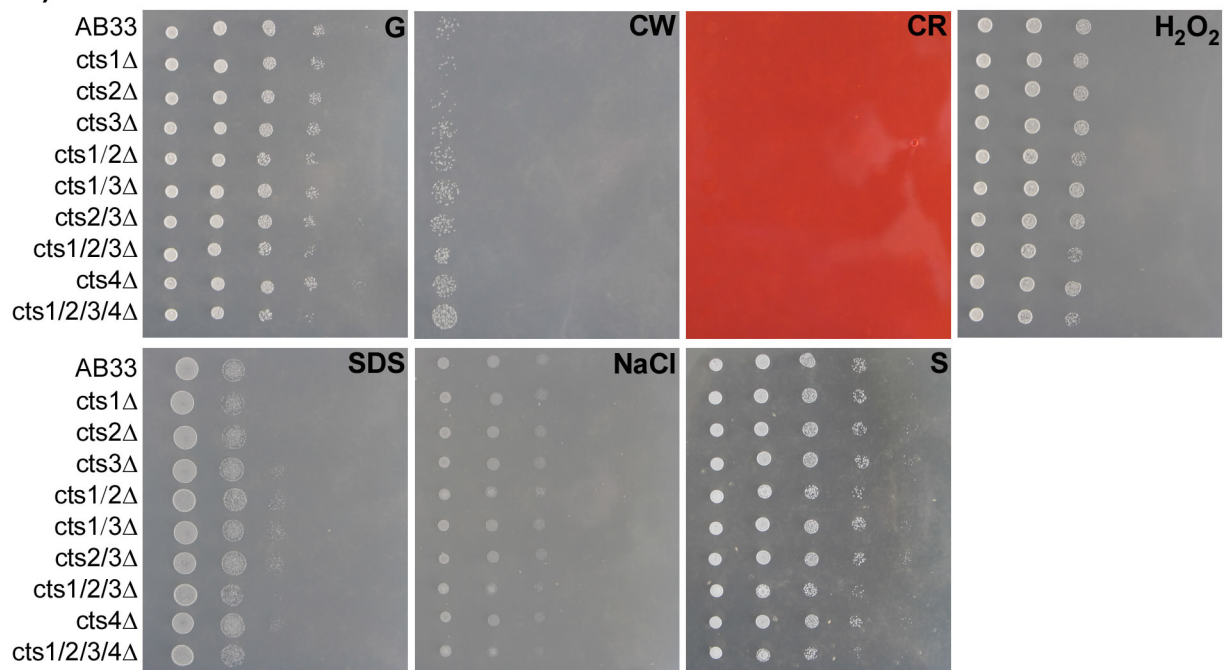

**Fig. S8: Chitinases do not influence stress tolerance of *U. maydis*.** Plate growth assay of *U. maydis* strains on CM-G (yeast-cells) and NM-G (filaments) agar plates containing the stress inducing agents CW, CR, hydrogen peroxide (H<sub>2</sub>O<sub>2</sub>), sodium dodecyl sulfate (SDS), sodium chloride (NaCl), or sorbitol (S). None of the strains was affected by the stress-inducing reagents during either yeast-like or filamentous growth.

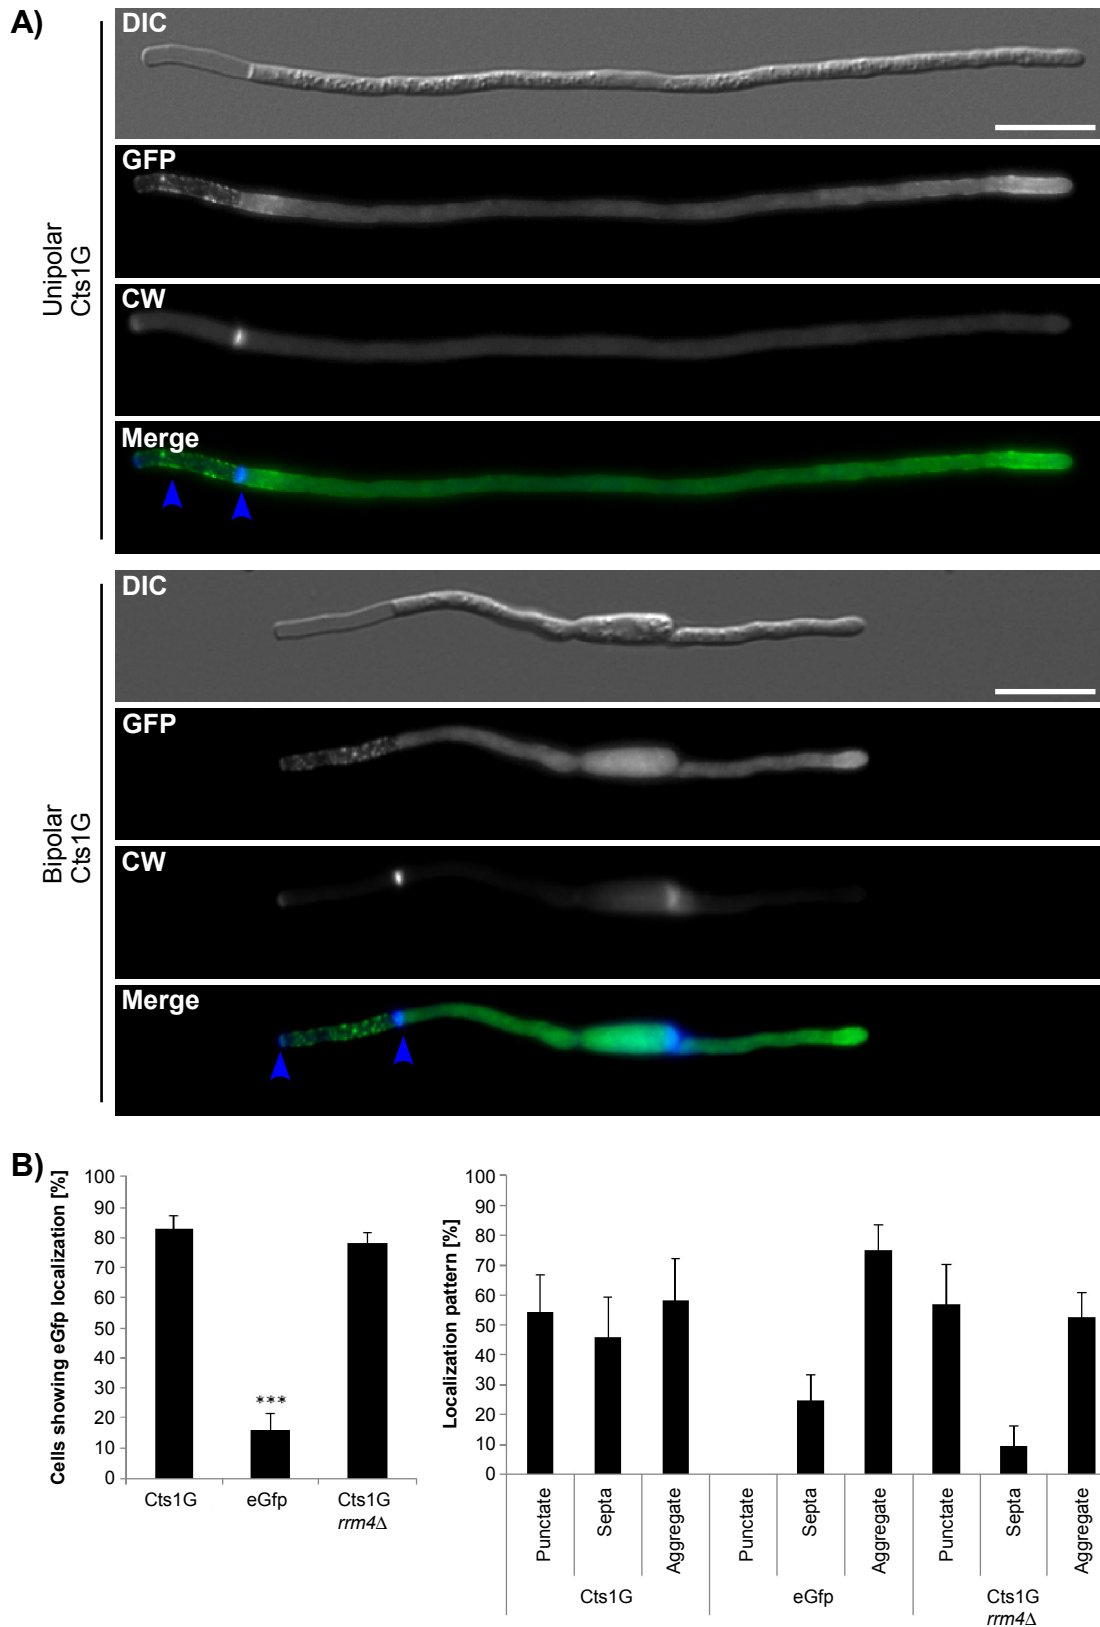

**Fig. S9: Cts1G localization to empty sections is independent of Rrm4. (A)** Co-localization of Cts1G and the cell wall marker CW in unipolar and bipolar AB33*rrm4*Δ filaments. Cts1G abundance gradually increases towards the hyphal tip as described for AB33 cells. Also similar to AB33 cells, punctate Cts1G accumulations occur between the 1st and the 2nd septum (septa indicated by arrowheads) in both unipolar and bipolar filaments. **(B)** Quantification of localization patterns extended from Fig. 5.

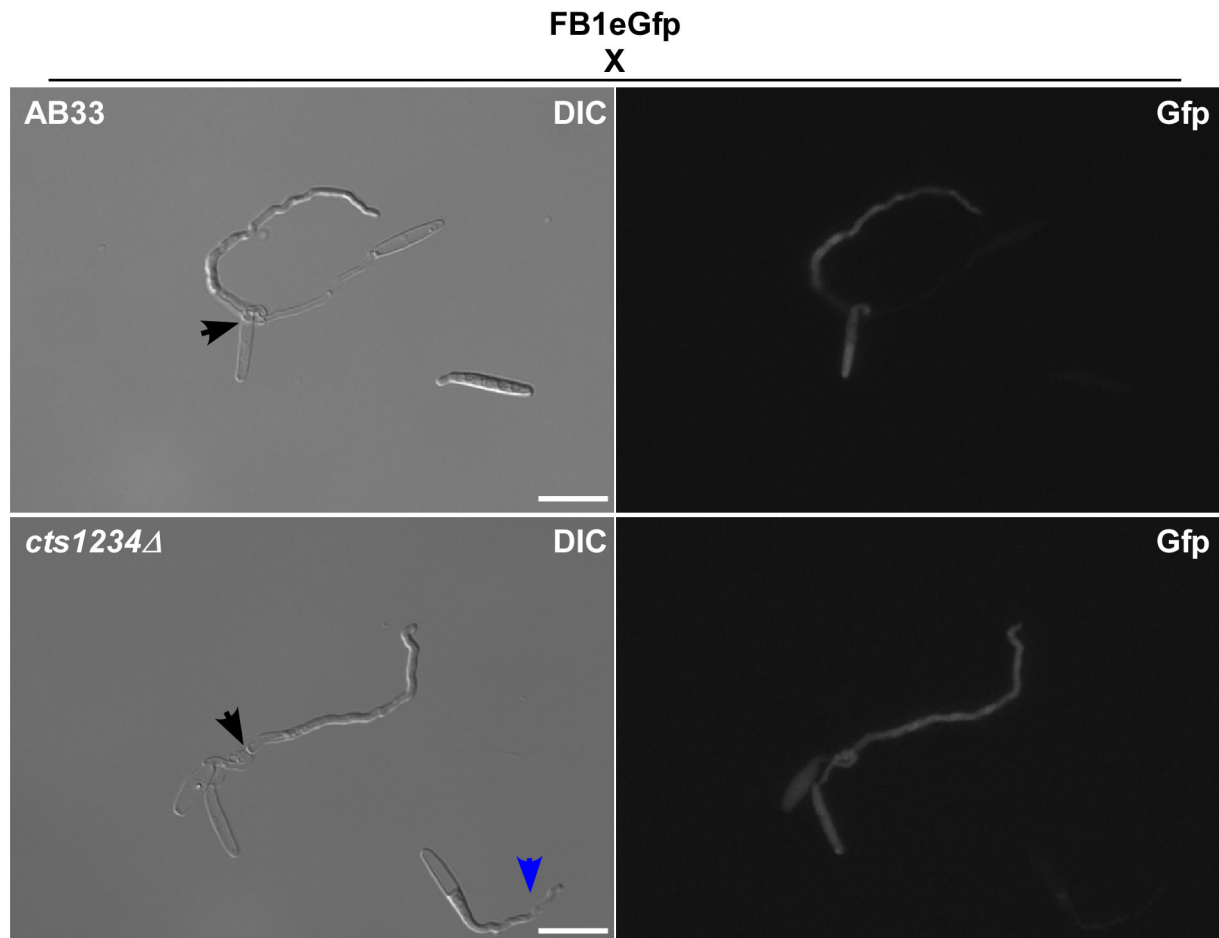

**Fig. S10: Mating of chitinase deficient strains.** Microscopic analysis of mating events in crossings of AB33 or corresponding chitinase deletion mutants with the compatible mating partner FB1eGfp. All chitinase deficient strains were still able to fuse with FB1eGfp, and to initialize early stages of filamentous growth (exemplarily shown for AB33*cts1Δcts3Δcts4Δ*). Fusion sites are highlighted by black arrows. Hence it is sufficient if one partner provides chitinases or chitinases are dispensable for mating. Scale bars, 10  $\mu$ m.
